# Supplementary material for: In silico binding affinity prediction for metabotropic glutamate receptors using both endpoint free energy methods and a machine learning-based scoring function
Source: Royal Society of Chemistry journal article supplement (doi:10.1039/d2cp01727j), 2022-01-01
Supplement: d2cp01727j1.pdf [file d2cp01727j1.pdf]

**Identification of active ligands for metabotropic glutamate receptor 4 (mGluR4) using a hierarchical virtual screening method**

**[Supporting Information]**

Jingchen Zhai,<sup>1</sup> Xibing He,<sup>1</sup> Yuchen Sun,<sup>1</sup> Zhuoya Wan,<sup>2</sup> Beihong Ji,<sup>1</sup> Shuhan Liu,<sup>1</sup> Song Li,<sup>2</sup>  
Junmei Wang<sup>1\*</sup>

<sup>1</sup> *Department of Pharmaceutical Sciences and Computational Chemical Genomics Screening Center, School of Pharmacy, University of Pittsburgh, Pittsburgh, PA 15261, USA.*

<sup>2</sup> *Department of Pharmaceutical Sciences and Center for Pharmacogenetics, School of Pharmacy, University of Pittsburgh, Pittsburgh, PA 15261, USA.*

\* Corresponding authors:

Junmei Wang, E-mail: [junmei.wang@pitt.edu](mailto:junmei.wang@pitt.edu)

**Table S1.** The mGluR proteins resolved crystal structure information from Protein Data Bank and respective data count of ligand experimental activity from ChEMBL database by the time this paper was writing.

| <b>Group</b>   | <b>Protein</b> | <b>Ligand experimental KI data count</b> | <b>Structure information (human) -- PDBID</b>                    |
|----------------|----------------|------------------------------------------|------------------------------------------------------------------|
| <b>Group 1</b> | mGluR1         | 106                                      | 3KS9, 4OR2, 3LMK                                                 |
|                | mGluR5         | 498                                      | 3LMK, 6FFI, 6FFH, 4OO9, 6N4X, 6N50, 6N52, 6N51, 5CGD, 6N4Y, 5CGC |
| <b>Group 2</b> | mGluR2         | 203                                      | 4XAQ, 4XAS, 6DUP, 5KZN, 5KZQ, 5CNJ, 4XAR, 5CNI                   |
|                | mGluR3         | 85                                       | 4XAR, 6B7H, 5CNK, 5CNM, 3SM9, 4XAQ                               |
| <b>Group 3</b> | mGluR4         | 76                                       | NA                                                               |
|                | mGluR6         | 24                                       | NA                                                               |
|                | mGluR7         | 19                                       | 3MQ4, 5C5C                                                       |
|                | mGluR8         | 20                                       | 6BSZ, 6BT5                                                       |

|        |     |                                                                            |
|--------|-----|----------------------------------------------------------------------------|
| mGluR4 | 111 | HMNSIRIDGDITLGGFLFPVHGRGSEKPCGELKKEKGIHRLEAMLFALDRINNDPDLNPNITLGARILDTCR   |
| mGluR8 | 108 | -AHSIRVDGDIILGGFLFPVHAKGERGVPCGELKKEKGIHRLEAMLYAIDQINKDPDLLSNITLGVRIILDTCR |
| mGluR4 | 207 | DTHALEQSLTFVQARVVGVI GASGSSVSIMVANILRLFKIPQISYASTAPDLSDNSRYDFFSRVVPSDTYQAQ |
| mGluR8 | 204 | DTYALEQSLTFVQ-KISGVI GAAASSVSIMVANILRLFKIPQISYASTAPELSDNTRYDFFSRVVPPDSYQAQ |
| mGluR4 | 280 | AMVDIVRALKWNVYSTVASEGSYGESGVEAFIQKSREDGGVCIASQSVKIPREPKAGEFDKIIRRLLETSNARA |
| mGluR8 | 277 | AMVDIVTALGWNVYSTLASEGNYGESGVEAFTQISREIGGVSIASQSKIIPREPRGFEFEKIIKRLLETPNARA |
| mGluR4 | 353 | VIIIFANEDDIRRVLEAARRANQTGHFWMGSDSWGSKIAPVLHLEEVAEGAVTILPKRMSVRFDRYFSSRTL   |
| mGluR8 | 350 | VIMFANEDDIRRILEAAKKNLQSGHFLWIGSDSWGSKIAPVYQQEEIAEGAVTILPKRASI DGFDRYFRSRTL |
| mGluR4 | 438 | DNRRNIWFAEFWEDNFHCKLKCTNRERIGQDSAYEQEGKVQFVIDAVYAMGHALHAMHRDLCPGRVGLCPRM   |
| mGluR8 | 434 | ANRRNVWFAEFWEENFGCKLKCTGLERIRDSSYEQEGKVQFVIDAVYSMAYALHNMHKDLCPGYIGLCPRM    |
| mGluR4 | 508 | DPVDGTQLLKYIRNVNFSGIAGNPVTFNENGDAPGRYDIYQYQLRNDSA EYKVI GSWTDHLHLRIERMHW*  |
| mGluR8 | 504 | STIDGKELLGYIRAVNFNGSAGTPVTFNENGDAPGRYDIFQYQITNKSTEYKVI GHWTNQLHLKVEDMQW*   |

■  $\alpha$ -helix ■  $\beta$ -sheet □ Target sequence ■ Template sequence

**Fig. S1** Sequence comparison and alignment of mGluR4 with its template mGluR8. The PDB code of resolved crystal structure of mGluR8 is 6BT5.

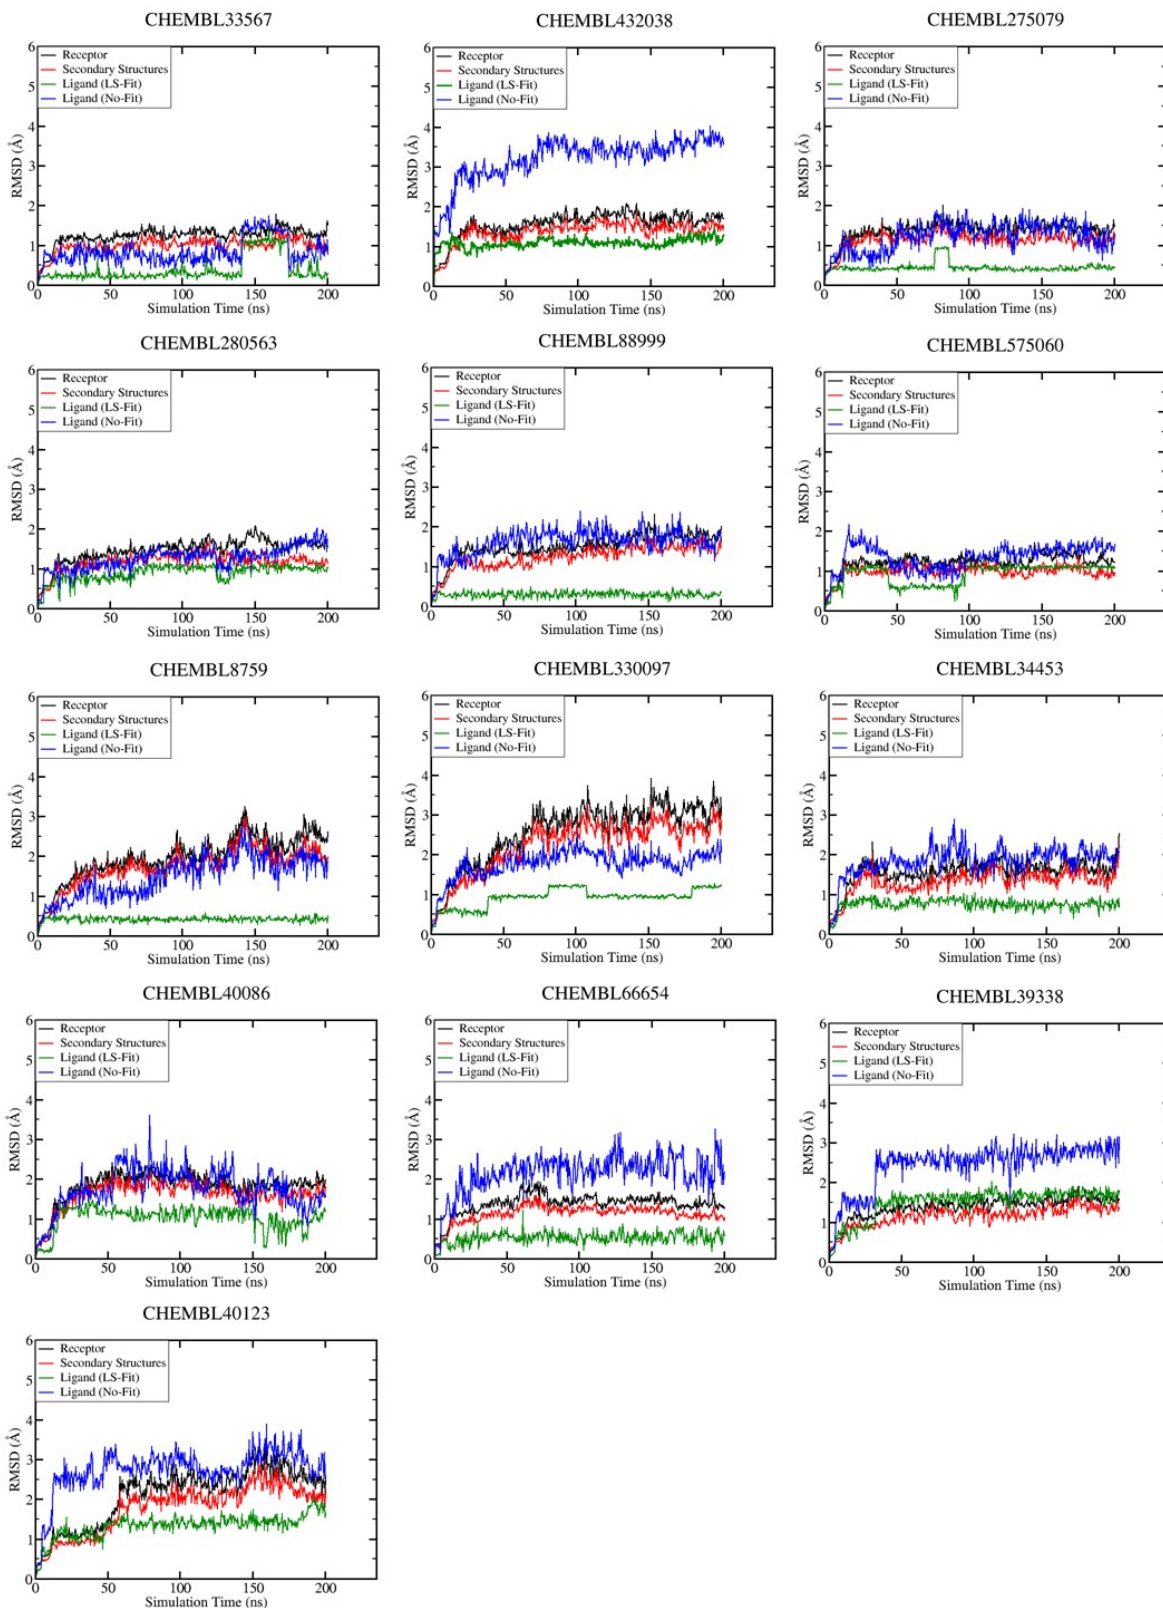

**Fig. S2** Fluctuations of Root-Mean-Square Deviations (RMSDs) along the time course of MD simulations for twelve mGluR8-ligand systems, of which the fluctuations are within 6 Å.

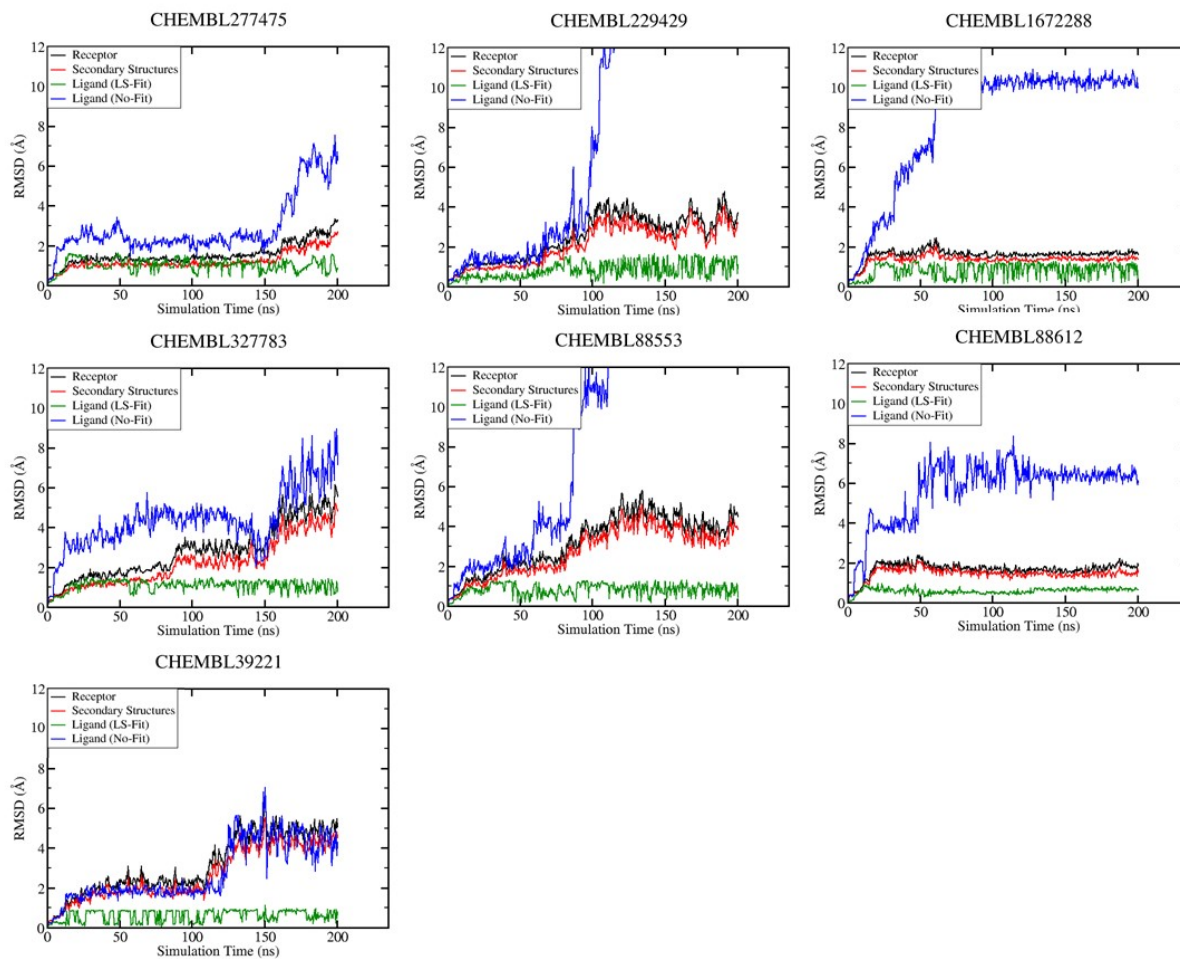

**Fig. S3** Fluctuations of Root-Mean-Square Deviations (RMSDs) along the time course of MD simulations for eight mGluR8-ligand systems, of which the fluctuation is larger than 6 Å.

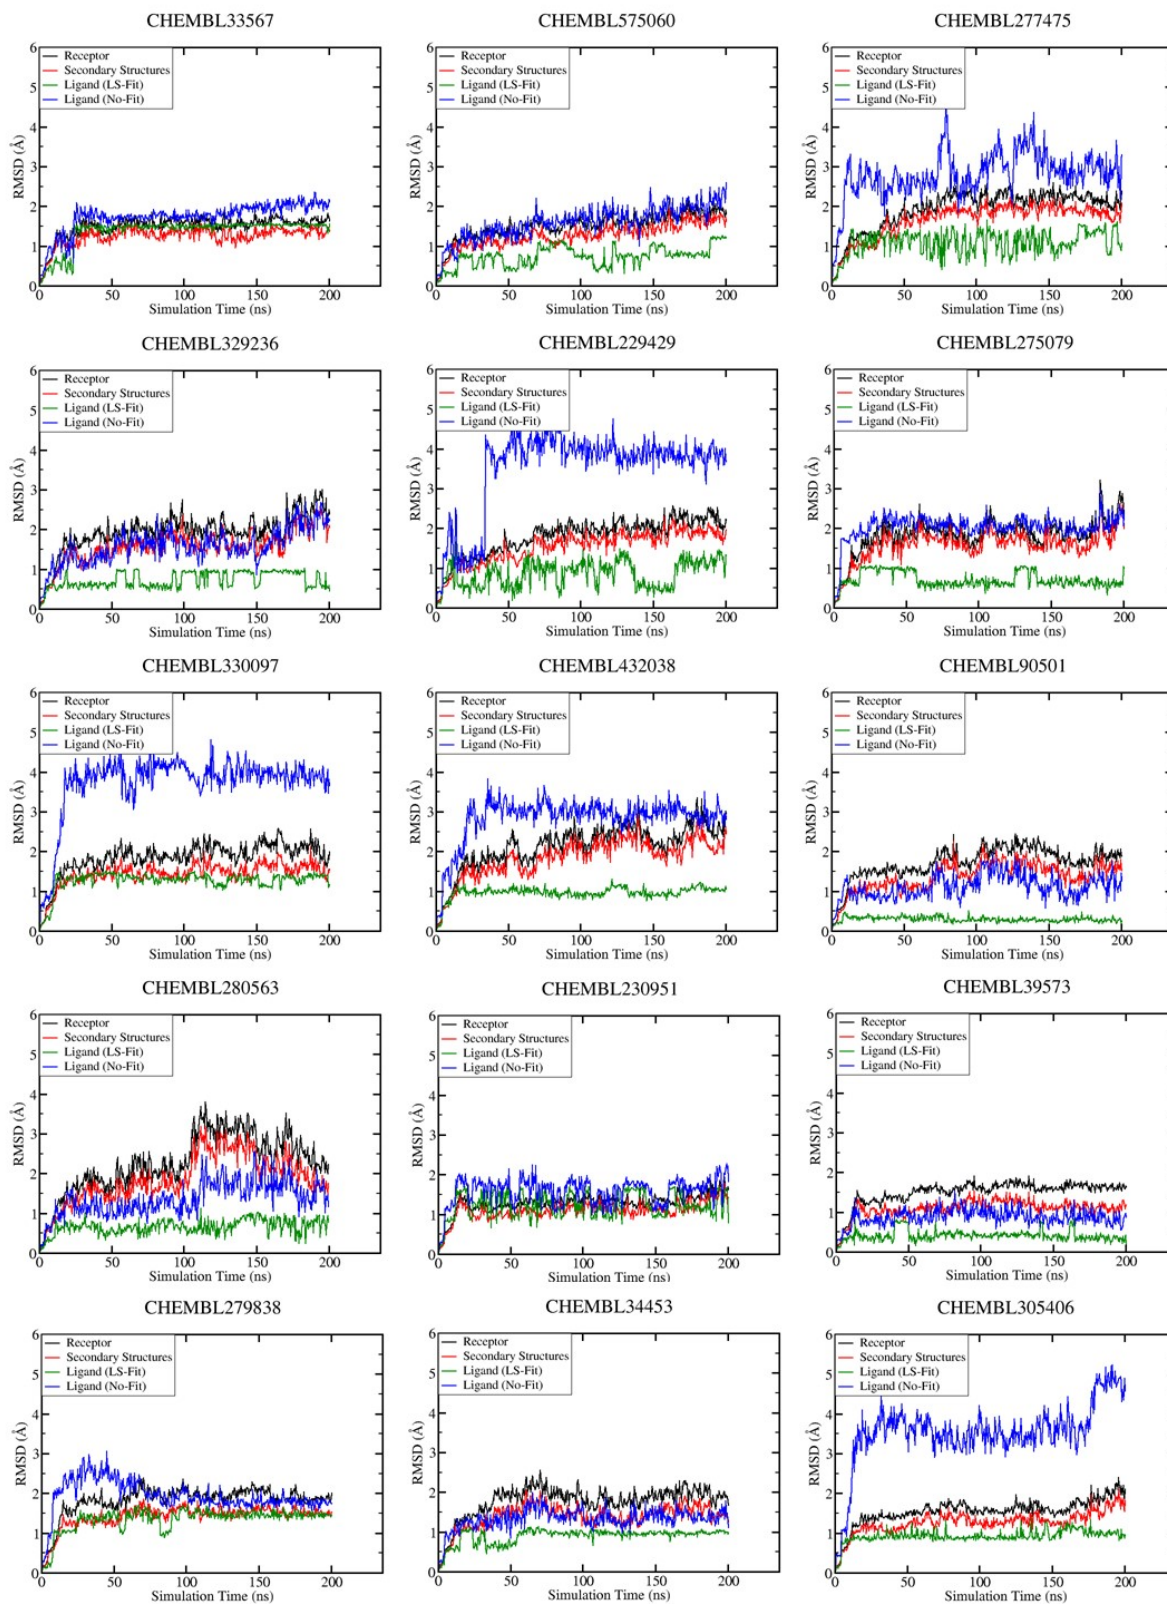

**Fig. S4** Fluctuations of Root-Mean-Square Deviations (RMSDs) along the time course of MD simulations for 16 mGluR4-ligand systems, of which the fluctuation is within 6 Å.

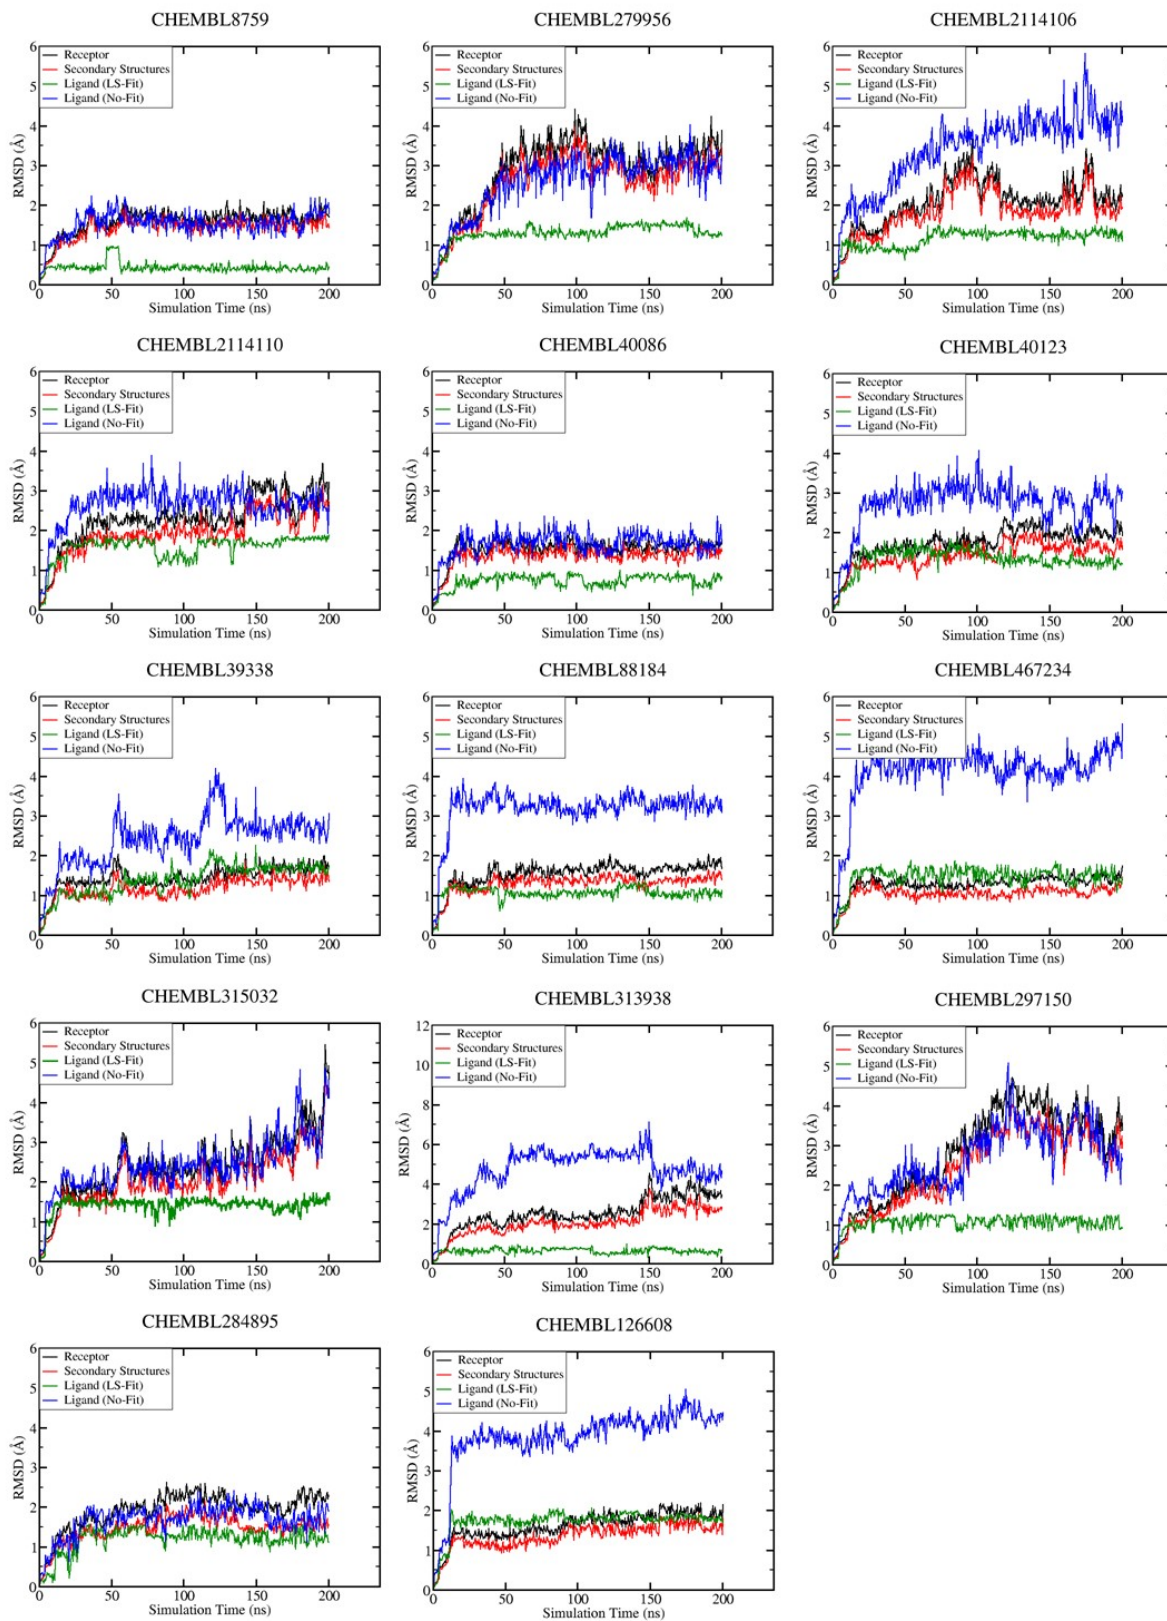

ig. S4 (continue) Fluctuations of Root-Mean-Square Deviations (RMSDs) along the time course of MD

simulations for 16 mGluR4-ligand systems, of which the fluctuation is within 6 Å.



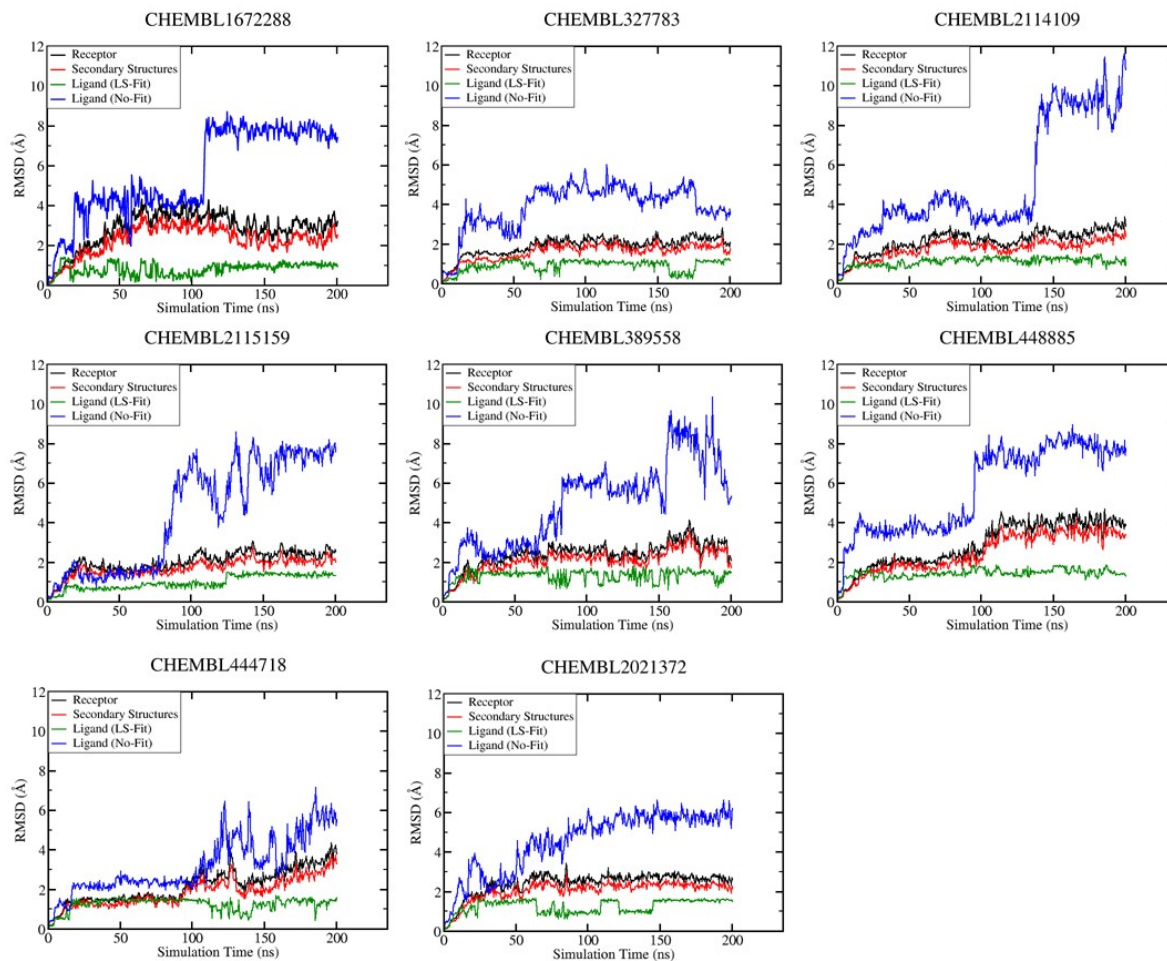

F

**fig. S5** Fluctuations of Root-Mean-Square Deviations (RMSDs) along the time course of MD simulations for 9 mGluR4-ligand systems, of which the fluctuation is larger than 6 Å.

**Table S2.** Calculated individual energy terms of mGluR8 ligands using MM-PBSA (PB model) method in kcal/mol.

| Ligands       | $\Delta E_{vdw}$ | $\Delta E_{ele}$ | $\Delta G_p^{sol}$ | $\Delta G_{np}^{sol}$ | $T\Delta S$ | $\Delta G_{MM/PBSA}$ |
|---------------|------------------|------------------|--------------------|-----------------------|-------------|----------------------|
| CHEMBL575060  | -14.22±0.45      | -196.08±2.21     | 158.93±0.55        | -1.19±0.00            | -18.20±0.05 | -34.36±1.32          |
| CHEMBL33567   | -15.58±1.41      | -193.72±3.21     | 158.63±2.12        | -1.42±0.02            | -18.74±0.08 | -33.35±0.42          |
| CHEMBL275079  | -17.37±0.82      | -167.31±3.44     | 136.81±1.76        | -1.39±0.02            | -18.42±0.04 | -30.84±1.29          |
| CHEMBL88999   | -19.59±0.68      | -151.13±3.37     | 126.42±1.52        | -1.56±0.00            | -18.71±0.08 | -27.16±1.45          |
| CHEMBL280563  | -15.06±0.49      | -167.10±0.52     | 138.40±2.29        | -1.36±0.01            | -18.10±0.02 | -27.01±1.52          |
| CHEMBL8759    | -16.48±0.85      | -183.68±3.03     | 156.75±1.47        | -1.48±0.01            | -18.31±0.09 | -26.59±0.89          |
| CHEMBL330097  | -14.30±0.62      | -185.25±2.00     | 166.90±1.78        | -1.56±0.01            | -18.00±0.03 | -16.20±1.90          |
| CHEMBL432038  | -43.87±0.78      | -132.23±0.86     | 139.80±1.18        | -3.14±0.00            | -23.41±0.02 | -16.02±0.27          |
| CHEMBL34453   | -18.50±0.75      | -152.12±1.75     | 140.59±2.28        | -1.52±0.02            | -18.13±0.08 | -13.41±0.82          |
| CHEMBL39338   | -43.79±1.08      | -124.77±1.29     | 137.29±1.06        | -3.99±0.03            | -23.28±0.10 | -11.98±0.90          |
| CHEMBL327783  | -24.25±0.41      | -16.68±0.89      | 29.41±1.15         | -1.87±0.06            | -16.01±0.12 | 2.62±0.31            |
| CHEMBL229429  | -17.57±0.86      | -2.73±0.39       | 9.99±0.55          | -1.35±0.07            | -15.07±0.20 | 3.41±0.90            |
| CHEMBL66654   | -36.56±0.54      | -8.44±0.24       | 36.17±0.87         | -2.51±0.01            | -18.29±0.13 | 6.96±0.58            |
| CHEMBL40123   | -31.82±0.61      | -97.29±2.15      | 120.72±1.32        | -2.99±0.03            | -19.97±0.20 | 8.59±0.68            |
| CHEMBL88553   | -5.95±0.11       | -3.28±0.91       | 6.86±1.14          | 0.12±0.02             | -11.66±0.03 | 9.40±0.36            |
| CHEMBL88612   | -30.25±0.41      | -7.01±0.13       | 32.59±0.76         | -2.40±0.01            | -17.70±0.03 | 10.63±0.62           |
| CHEMBL277475  | -14.06±0.68      | -213.18±8.47     | 223.62±7.60        | -2.13±0.02            | -17.31±0.08 | 11.55±0.92           |
| CHEMBL1672288 | -28.80±0.07      | -14.61±0.21      | 42.59±0.41         | -2.16±0.02            | -17.71±0.09 | 14.73±0.59           |
| CHEMBL40086   | -19.04±0.35      | -88.77±2.17      | 111.40±2.23        | -1.68±0.01            | -16.58±0.05 | 18.49±0.32           |
| CHEMBL39221   | 23.90±4.51       | -43.25±2.62      | 108.31±0.21        | -1.34±0.01            | -15.24±0.06 | 102.86±2.05          |

**Table S3.** Calculated individual energy terms of mGluR8 ligands using MM-GBSA (GB1 model) method in kcal/mol.

| Ligands       | $\Delta E_{vdw}$ | $\Delta E_{ele}$ | $\Delta G_p^{sol}$ | $\Delta G_{np}^{sol}$ | $T\Delta S$ | $\Delta G_{MM/GBSA}$ |
|---------------|------------------|------------------|--------------------|-----------------------|-------------|----------------------|
| CHEMBL33567   | -15.58±1.41      | -193.72±3.21     | 112.24±1.75        | -3.62±0.00            | -18.74±0.08 | -81.95±1.09          |
| CHEMBL575060  | -14.22±0.45      | -196.08±2.21     | 121.62±0.84        | -3.45±0.01            | -18.20±0.05 | -73.93±1.72          |
| CHEMBL432038  | -43.87±0.78      | -132.23±0.86     | 90.51±1.65         | -5.63±0.03            | -23.41±0.02 | -67.80±0.20          |
| CHEMBL275079  | -17.37±0.82      | -167.31±3.44     | 102.42±2.05        | -3.26±0.01            | -18.42±0.04 | -67.10±0.95          |
| CHEMBL39338   | -43.79±1.08      | -124.77±1.29     | 87.86±0.50         | -6.51±0.02            | -23.28±0.10 | -63.94±0.61          |
| CHEMBL88999   | -19.59±0.68      | -151.13±3.37     | 93.50±1.83         | -3.28±0.02            | -18.71±0.08 | -61.79±1.54          |
| CHEMBL280563  | -15.06±0.49      | -167.10±0.52     | 106.32±0.90        | -3.18±0.02            | -18.10±0.02 | -60.91±0.25          |
| CHEMBL8759    | -16.48±0.85      | -183.68±3.03     | 124.59±1.29        | -3.40±0.03            | -18.31±0.09 | -60.66±1.27          |
| CHEMBL330097  | -14.30±0.62      | -185.25±2.00     | 133.29±1.26        | -3.26±0.03            | -18.00±0.03 | -51.52±0.89          |
| CHEMBL34453   | -18.50±0.75      | -152.12±1.75     | 110.56±2.06        | -3.40±0.00            | -18.13±0.08 | -45.33±0.59          |
| CHEMBL40123   | -31.82±0.61      | -97.29±2.15      | 86.54±1.17         | -4.92±0.07            | -19.97±0.20 | -27.52±0.66          |
| CHEMBL277475  | -14.06±0.68      | -213.18±8.47     | 188.84±7.24        | -3.78±0.04            | -17.31±0.08 | -24.88±1.33          |
| CHEMBL40086   | -19.04±0.35      | -88.77±2.17      | 76.19±1.79         | -3.30±0.02            | -16.58±0.05 | -18.33±0.50          |
| CHEMBL66654   | -36.56±0.54      | -8.44±0.24       | 16.36±0.11         | -4.41±0.05            | -18.29±0.13 | -14.76±0.37          |
| CHEMBL1672288 | -28.80±0.07      | -14.61±0.21      | 20.61±0.18         | -4.12±0.04            | -17.71±0.09 | -9.21±0.21           |
| CHEMBL88612   | -30.25±0.41      | -7.01±0.13       | 14.61±0.09         | -4.25±0.02            | -17.70±0.03 | -9.21±0.39           |
| CHEMBL327783  | -24.25±0.41      | -16.68±0.89      | 22.22±1.20         | -2.97±0.07            | -16.01±0.12 | -5.67±0.21           |
| CHEMBL229429  | -17.57±0.86      | -2.73±0.39       | 7.80±0.43          | -2.55±0.10            | -15.07±0.20 | 0.02±0.74            |
| CHEMBL88553   | -5.95±0.11       | -3.28±0.91       | 5.42±1.00          | -0.81±0.01            | -11.66±0.03 | 7.04±0.21            |
| CHEMBL39221   | 23.90±4.51       | -43.25±2.62      | 59.72±1.23         | -2.45±0.02            | -15.24±0.06 | 53.16±2.08           |

**Table S4.** Calculated individual energy terms of mGluR8 ligands using MM-GBSA (GB2 model) method in kcal/mol.

| Ligands       | $\Delta E_{vdw}$ | $\Delta E_{ele}$ | $\Delta G_p^{sol}$ | $\Delta G_{np}^{sol}$ | $T\Delta S$ | $\Delta G_{MM/GBSA}$ |
|---------------|------------------|------------------|--------------------|-----------------------|-------------|----------------------|
| CHEMBL33567   | -15.58±1.41      | -193.72±3.21     | 111.18±1.42        | -3.62±0.00            | -18.74±0.08 | -83.01±1.70          |
| CHEMBL575060  | -14.22±0.45      | -196.08±2.21     | 126.15±2.04        | -3.45±0.01            | -18.20±0.05 | -69.41±3.87          |
| CHEMBL275079  | -17.37±0.82      | -167.31±3.44     | 103.09±3.13        | -3.26±0.01            | -18.42±0.04 | -66.43±3.36          |
| CHEMBL280563  | -15.06±0.49      | -167.10±0.52     | 106.11±1.23        | -3.18±0.02            | -18.10±0.02 | -61.12±1.43          |
| CHEMBL432038  | -43.87±0.78      | -132.23±0.86     | 97.81±2.74         | -5.63±0.03            | -23.41±0.02 | -60.50±1.27          |
| CHEMBL88999   | -19.59±0.68      | -151.13±3.37     | 102.01±1.21        | -3.28±0.02            | -18.71±0.08 | -53.28±2.44          |
| CHEMBL8759    | -16.48±0.85      | -183.68±3.03     | 137.84±3.47        | -3.40±0.03            | -18.31±0.09 | -47.40±1.93          |
| CHEMBL39338   | -43.79±1.08      | -124.77±1.29     | 106.13±1.34        | -6.51±0.02            | -23.28±0.10 | -45.67±1.52          |
| CHEMBL330097  | -14.30±0.62      | -185.25±2.00     | 153.02±2.52        | -3.26±0.03            | -18.00±0.03 | -31.79±1.45          |
| CHEMBL34453   | -18.50±0.75      | -152.12±1.75     | 137.36±2.70        | -3.40±0.00            | -18.13±0.08 | -18.53±0.60          |
| CHEMBL40123   | -31.82±0.61      | -97.29±2.15      | 103.04±2.26        | -4.92±0.07            | -19.97±0.20 | -11.02±0.50          |
| CHEMBL277475  | -14.06±0.68      | -213.18±8.47     | 203.60±7.53        | -3.78±0.04            | -17.31±0.08 | -10.12±1.00          |
| CHEMBL66654   | -36.56±0.54      | -8.44±0.24       | 23.28±0.65         | -4.41±0.05            | -18.29±0.13 | -7.84±0.96           |
| CHEMBL88612   | -30.25±0.41      | -7.01±0.13       | 19.29±0.44         | -4.25±0.02            | -17.70±0.03 | -4.52±0.56           |
| CHEMBL327783  | -24.25±0.41      | -16.68±0.89      | 27.79±1.08         | -2.97±0.07            | -16.01±0.12 | -0.10±0.61           |
| CHEMBL1672288 | -28.80±0.07      | -14.61±0.21      | 29.88±0.20         | -4.12±0.04            | -17.71±0.09 | 0.05±0.13            |
| CHEMBL229429  | -17.57±0.86      | -2.73±0.39       | 11.88±0.15         | -2.55±0.10            | -15.07±0.20 | 4.10±0.52            |
| CHEMBL40086   | -19.04±0.35      | -88.77±2.17      | 101.13±2.50        | -3.30±0.02            | -16.58±0.05 | 6.61±0.44            |
| CHEMBL88553   | -5.95±0.11       | -3.28±0.91       | 6.88±0.88          | -0.81±0.01            | -11.66±0.03 | 8.49±0.18            |
| CHEMBL39221   | 23.90±4.51       | -43.25±2.62      | 75.51±2.46         | -2.45±0.02            | -15.24±0.06 | 68.96±3.66           |

**Table S5.** Calculated individual energy terms of mGluR8 ligands using MM-GBSA (GB5 model) method in kcal/mol.

| Ligands       | $\Delta E_{vdw}$ | $\Delta E_{ele}$ | $\Delta G_p^{sol}$ | $\Delta G_{np}^{sol}$ | $T\Delta S$ | $\Delta G_{MMGBSA}$ |
|---------------|------------------|------------------|--------------------|-----------------------|-------------|---------------------|
| CHEMBL33567   | -15.58±1.41      | -193.72±3.21     | 93.29±2.88         | -3.62±0.00            | -18.74±0.08 | -100.89±3.07        |
| CHEMBL280563  | -15.06±0.49      | -167.10±0.52     | 81.61±1.89         | -3.18±0.02            | -18.10±0.02 | -85.62±2.62         |
| CHEMBL575060  | -14.22±0.45      | -196.08±2.21     | 111.73±5.79        | -3.45±0.01            | -18.20±0.05 | -83.83±7.57         |
| CHEMBL275079  | -17.37±0.82      | -167.31±3.44     | 87.51±8.50         | -3.26±0.01            | -18.42±0.04 | -82.01±8.83         |
| CHEMBL88999   | -19.59±0.68      | -151.13±3.37     | 101.08±4.99        | -3.28±0.02            | -18.71±0.08 | -54.21±5.78         |
| CHEMBL432038  | -43.87±0.78      | -132.23±0.86     | 104.67±5.07        | -5.63±0.03            | -23.41±0.02 | -53.64±3.73         |
| CHEMBL39338   | -43.79±1.08      | -124.77±1.29     | 108.92±3.69        | -6.51±0.02            | -23.28±0.10 | -42.88±3.86         |
| CHEMBL8759    | -16.48±0.85      | -183.68±3.03     | 149.62±5.79        | -3.40±0.03            | -18.31±0.09 | -35.63±3.99         |
| CHEMBL277475  | -14.06±0.68      | -213.18±8.47     | 211.55±7.01        | -3.78±0.04            | -17.31±0.08 | -2.17±1.78          |
| CHEMBL34453   | -18.50±0.75      | -152.12±1.75     | 161.47±3.39        | -3.40±0.00            | -18.13±0.08 | 5.58±2.36           |
| CHEMBL330097  | -14.30±0.62      | -185.25±2.00     | 190.55±4.28        | -3.26±0.03            | -18.00±0.03 | 5.74±3.40           |
| CHEMBL66654   | -36.56±0.54      | -8.44±0.24       | 37.47±1.90         | -4.41±0.05            | -18.29±0.13 | 6.35±2.22           |
| CHEMBL88612   | -30.25±0.41      | -7.01±0.13       | 32.83±1.23         | -4.25±0.02            | -17.70±0.03 | 9.02±1.21           |
| CHEMBL88553   | -5.95±0.11       | -3.28±0.91       | 8.52±1.10          | -0.81±0.01            | -11.66±0.03 | 10.14±0.33          |
| CHEMBL229429  | -17.57±0.86      | -2.73±0.39       | 20.12±1.17         | -2.55±0.10            | -15.07±0.20 | 12.33±1.11          |
| CHEMBL327783  | -24.25±0.41      | -16.68±0.89      | 41.27±1.58         | -2.97±0.07            | -16.01±0.12 | 13.38±1.53          |
| CHEMBL40123   | -31.82±0.61      | -97.29±2.15      | 130.30±3.76        | -4.92±0.07            | -19.97±0.20 | 16.24±2.43          |
| CHEMBL1672288 | -28.80±0.07      | -14.61±0.21      | 46.54±0.23         | -4.12±0.04            | -17.71±0.09 | 16.72±0.10          |
| CHEMBL40086   | -19.04±0.35      | -88.77±2.17      | 149.35±3.53        | -3.30±0.02            | -16.58±0.05 | 54.82±1.51          |
| CHEMBL39221   | 23.90±4.51       | -43.25±2.62      | 102.98±7.04        | -2.45±0.02            | -15.24±0.06 | 96.42±8.58          |

**Table S6.** Calculated individual energy terms of mGluR4 ligands using MM-PBSA (PB model) method in kcal/mol.

| Ligands       | $\Delta E_{vdw}$ | $\Delta E_{ele}$ | $\Delta G_p^{sol}$ | $\Delta G_{np}^{sol}$ | $T\Delta S$ | $\Delta G_{MM/PBSA}$ |
|---------------|------------------|------------------|--------------------|-----------------------|-------------|----------------------|
| CHEMBL33567   | -21.93±1.06      | -232.70±2.95     | 199.11±1.69        | -1.36±0.00            | -19.02±0.01 | -37.85±1.50          |
| CHEMBL39573   | -25.26±0.27      | -199.86±1.36     | 178.55±1.88        | -2.08±0.01            | -19.51±0.06 | -29.14±0.28          |
| CHEMBL8759    | -17.78±0.56      | -228.11±1.43     | 200.12±1.14        | -1.50±0.01            | -18.55±0.03 | -28.72±0.66          |
| CHEMBL230951  | -20.71±0.99      | -213.19±0.86     | 188.30±1.85        | -1.30±0.01            | -18.72±0.08 | -28.18±0.30          |
| CHEMBL275079  | -17.09±0.84      | -237.98±2.30     | 212.15±0.70        | -1.40±0.01            | -18.22±0.04 | -26.09±0.95          |
| CHEMBL90501   | -19.31±0.37      | -215.64±3.31     | 193.31±2.45        | -1.38±0.01            | -18.49±0.05 | -24.53±0.82          |
| CHEMBL40086   | -20.07±0.35      | -236.90±2.25     | 215.86±2.02        | -1.26±0.01            | -18.30±0.08 | -24.07±2.27          |
| CHEMBL329236  | -19.01±0.83      | -356.81±4.84     | 334.49±4.16        | -1.68±0.01            | -19.45±0.07 | -23.57±0.48          |
| CHEMBL34453   | -21.29±0.28      | -206.49±2.98     | 187.32±2.47        | -1.38±0.01            | -18.45±0.06 | -23.39±1.24          |
| CHEMBL575060  | -14.36±1.03      | -223.63±2.17     | 199.61±1.96        | -1.22±0.01            | -18.17±0.06 | -21.43±0.92          |
| CHEMBL432038  | -33.74±1.91      | -230.74±4.65     | 227.35±3.65        | -3.10±0.01            | -22.32±0.09 | -17.90±1.46          |
| CHEMBL40123   | -35.84±1.92      | -195.14±1.60     | 198.24±1.02        | -3.31±0.01            | -22.57±0.10 | -13.48±0.77          |
| CHEMBL39338   | -44.27±0.89      | -190.38±3.58     | 206.29±1.70        | -4.06±0.02            | -23.37±0.10 | -9.04±1.25           |
| CHEMBL315032  | -18.81±0.33      | -191.83±2.72     | 186.17±1.87        | -1.66±0.03            | -17.31±0.16 | -8.84±0.65           |
| CHEMBL297150  | -18.47±0.48      | -183.22±4.26     | 178.12±3.53        | -1.45±0.02            | -17.05±0.04 | -7.97±0.89           |
| CHEMBL313938  | -17.03±0.24      | -175.06±3.54     | 169.43±2.93        | -1.95±0.01            | -16.80±0.11 | -7.80±0.45           |
| CHEMBL279838  | -18.67±0.95      | -194.44±1.17     | 188.98±1.31        | -1.58±0.02            | -18.69±0.09 | -7.02±0.92           |
| CHEMBL2021372 | -14.45±0.40      | -220.56±0.91     | 215.45±2.14        | -2.12±0.01            | -16.97±0.04 | -4.71±1.17           |
| CHEMBL277475  | -15.43±0.45      | -331.32±5.32     | 330.65±4.39        | -2.12±0.00            | -17.10±0.04 | -1.12±1.32           |
| CHEMBL280563  | -14.45±0.99      | -167.57±0.96     | 165.98±1.35        | -1.38±0.00            | -16.39±0.02 | -1.02±0.53           |
| CHEMBL444718  | -10.02±1.27      | -184.31±0.94     | 181.13±1.53        | -1.52±0.08            | -14.79±0.22 | 0.08±0.70            |
| CHEMBL279956  | -19.12±0.93      | -76.75±1.57      | 81.81±1.49         | -1.49±0.02            | -17.00±0.11 | 1.45±0.64            |
| CHEMBL448885  | -11.20±1.13      | -232.27±1.57     | 231.74±2.68        | -2.00±0.04            | -16.70±0.10 | 2.96±0.38            |
| CHEMBL2114109 | -17.44±0.62      | -186.44±1.36     | 192.73±3.76        | -2.16±0.02            | -17.17±0.19 | 3.86±2.04            |
| CHEMBL2115159 | -19.42±1.13      | -159.87±6.09     | 168.24±4.32        | -2.25±0.05            | -17.64±0.17 | 4.34±1.32            |
| CHEMBL2114110 | -22.20±0.57      | -128.25±2.94     | 140.13±2.60        | -2.06±0.03            | -16.78±0.29 | 4.40±1.33            |
| CHEMBL88184   | -23.89±1.07      | -108.59±2.74     | 119.98±2.15        | -1.46±0.02            | -18.59±0.04 | 4.64±0.50            |
| CHEMBL284895  | -16.89±0.29      | -109.56±1.11     | 116.03±0.63        | -1.36±0.00            | -17.19±0.06 | 5.41±1.03            |
| CHEMBL389558  | -13.26±0.57      | -208.25±3.20     | 212.96±4.38        | -1.37±0.05            | -15.48±0.11 | 5.56±1.96            |
| CHEMBL330097  | -16.57±0.67      | -140.19±4.01     | 148.15±3.09        | -1.78±0.03            | -16.05±0.07 | 5.68±0.61            |
| CHEMBL2114106 | -21.05±0.26      | -170.15±3.95     | 182.61±2.16        | -2.19±0.03            | -17.36±0.09 | 6.59±1.75            |
| CHEMBL1672288 | -34.56±0.72      | -18.41±0.31      | 42.85±0.70         | -2.41±0.01            | -20±0.15    | 7.47±0.51            |
| CHEMBL467234  | -26.10±0.32      | -191.63±2.05     | 208.71±1.83        | -2.14±0.03            | -19.51±0.14 | 8.34±1.75            |
| CHEMBL126608  | -26.80±0.55      | -94.66±2.71      | 112.63±1.99        | -1.75±0.00            | -18.94±0.06 | 8.36±0.27            |
| CHEMBL229429  | -36.06±0.27      | -4.98±0.67       | 33.51±1.02         | -2.87±0.00            | -18.88±0.07 | 8.47±0.32            |
| CHEMBL327783  | -29.38±0.42      | -9.35±1.66       | 32.94±1.46         | -2.49±0.02            | -17.1±0.17  | 8.82±0.20            |
| CHEMBL305406  | -46.77±0.67      | -6.21±0.36       | 44.57±0.61         | -3.39±0.02            | -22.43±0.13 | 10.62±0.99           |

**Table S7.** Calculated individual energy terms of mGluR4 ligands using MM-GBSA (GB1 model) method in kcal/mol.

| Ligands       | $\Delta E_{vdw}$ | $\Delta E_{ele}$ | $\Delta G_p^{sol}$ | $\Delta G_{np}^{sol}$ | $T\Delta S$ | $\Delta G_{MM/GBSA}$ |
|---------------|------------------|------------------|--------------------|-----------------------|-------------|----------------------|
| CHEMBL33567   | -21.93±1.06      | -232.70±2.95     | 160.29±1.17        | -3.85±0.02            | -19.02±0.01 | -79.18±1.58          |
| CHEMBL39573   | -25.26±0.27      | -199.86±1.36     | 137.94±2.32        | -4.10±0.01            | -19.51±0.06 | -71.77±0.95          |
| CHEMBL432038  | -33.74±1.91      | -230.74±4.65     | 176.14±1.86        | -5.50±0.00            | -22.32±0.09 | -71.52±1.74          |
| CHEMBL39338   | -44.27±0.89      | -190.38±3.58     | 146.85±2.00        | -6.67±0.06            | -23.37±0.10 | -71.09±0.99          |
| CHEMBL279838  | -18.67±0.95      | -194.44±1.17     | 128.65±1.26        | -3.92±0.02            | -18.69±0.09 | -69.69±1.33          |
| CHEMBL230951  | -20.71±0.99      | -213.19±0.86     | 149.98±2.04        | -3.94±0.03            | -18.72±0.08 | -69.14±0.62          |
| CHEMBL40123   | -35.84±1.92      | -195.14±1.60     | 146.24±1.15        | -5.92±0.06            | -22.57±0.10 | -68.10±0.67          |
| CHEMBL329236  | -19.01±0.83      | -356.81±4.84     | 293.73±3.23        | -4.08±0.05            | -19.45±0.07 | -66.73±1.01          |
| CHEMBL8759    | -17.78±0.56      | -228.11±1.43     | 165.28±2.12        | -3.49±0.02            | -18.55±0.03 | -65.55±1.02          |
| CHEMBL90501   | -19.31±0.37      | -215.64±3.31     | 154.51±2.89        | -3.33±0.02            | -18.49±0.05 | -65.29±0.83          |
| CHEMBL40086   | -20.07±0.35      | -236.90±2.25     | 177.70±1.73        | -3.32±0.02            | -18.30±0.08 | -64.29±1.85          |
| CHEMBL275079  | -17.09±0.84      | -237.98±2.30     | 177.29±1.15        | -3.39±0.03            | -18.22±0.04 | -62.95±0.60          |
| CHEMBL34453   | -21.29±0.28      | -206.49±2.98     | 152.66±2.81        | -3.39±0.01            | -18.45±0.06 | -60.06±1.28          |
| CHEMBL575060  | -14.36±1.03      | -223.63±2.17     | 164.04±2.35        | -3.65±0.01            | -18.17±0.06 | -59.43±0.69          |
| CHEMBL467234  | -26.10±0.32      | -191.63±2.05     | 159.21±1.10        | -4.36±0.03            | -19.51±0.14 | -43.37±0.66          |
| CHEMBL88184   | -23.89±1.07      | -108.59±2.74     | 79.30±1.83         | -3.76±0.01            | -18.59±0.04 | -38.34±0.26          |
| CHEMBL2021372 | -14.45±0.40      | -220.56±0.91     | 183.82±1.29        | -3.32±0.02            | -16.97±0.04 | -37.54±0.67          |
| CHEMBL277475  | -15.43±0.45      | -331.32±5.32     | 295.90±3.36        | -3.72±0.03            | -17.10±0.04 | -37.47±1.66          |
| CHEMBL315032  | -18.81±0.33      | -191.83±2.72     | 160.50±1.86        | -3.28±0.07            | -17.31±0.16 | -36.12±0.87          |
| CHEMBL297150  | -18.47±0.48      | -183.22±4.26     | 151.98±3.08        | -3.21±0.03            | -17.05±0.04 | -35.88±1.22          |
| CHEMBL126608  | -26.80±0.55      | -94.66±2.71      | 70.72±1.30         | -3.83±0.04            | -18.94±0.06 | -35.63±0.86          |
| CHEMBL2115159 | -19.42±1.13      | -159.87±6.09     | 134.79±4.67        | -3.77±0.06            | -17.64±0.17 | -30.64±0.67          |
| CHEMBL284895  | -16.89±0.29      | -109.56±1.11     | 82.07±0.20         | -3.16±0.02            | -17.19±0.06 | -30.35±1.01          |
| CHEMBL448885  | -11.20±1.13      | -232.27±1.57     | 200.01±2.90        | -3.14±0.05            | -16.70±0.10 | -29.90±1.04          |
| CHEMBL280563  | -14.45±0.99      | -167.57±0.96     | 138.88±0.71        | -2.98±0.03            | -16.39±0.02 | -29.72±0.24          |
| CHEMBL313938  | -17.03±0.24      | -175.06±3.54     | 151.40±2.71        | -3.37±0.03            | -16.80±0.11 | -27.25±1.69          |
| CHEMBL2114109 | -17.44±0.62      | -186.44±1.36     | 165.99±2.79        | -3.77±0.06            | -17.17±0.19 | -24.48±1.02          |
| CHEMBL2114106 | -21.05±0.26      | -170.15±3.95     | 153.59±3.17        | -3.84±0.04            | -17.36±0.09 | -24.08±0.80          |
| CHEMBL279956  | -19.12±0.93      | -76.75±1.57      | 58.65±1.14         | -3.20±0.04            | -17.00±0.11 | -23.43±0.70          |
| CHEMBL389558  | -13.26±0.57      | -208.25±3.20     | 185.87±2.28        | -2.97±0.06            | -15.48±0.11 | -23.13±1.56          |
| CHEMBL444718  | -10.02±1.27      | -184.31±0.94     | 161.89±0.55        | -2.46±0.08            | -14.79±0.22 | -20.11±0.47          |
| CHEMBL305406  | -46.77±0.67      | -6.21±0.36       | 16.80±0.20         | -5.63±0.05            | -22.43±0.13 | -19.39±0.69          |
| CHEMBL2114110 | -22.20±0.57      | -128.25±2.94     | 121.53±2.47        | -3.42±0.05            | -16.78±0.29 | -15.57±1.07          |
| CHEMBL1672288 | -34.56±0.72      | -18.41±0.31      | 25.24±0.11         | -5.10±0.05            | -20.00±0.15 | -12.83±0.43          |
| CHEMBL229429  | -36.06±0.27      | -4.98±0.67       | 14.21±0.42         | -4.80±0.02            | -18.88±0.07 | -12.75±0.37          |
| CHEMBL330097  | -16.57±0.67      | -140.19±4.01     | 135.00±2.98        | -2.86±0.03            | -16.05±0.07 | -8.55±0.76           |
| CHEMBL327783  | -29.38±0.42      | -9.35±1.66       | 16.89±0.95         | -3.72±0.05            | -17.10±0.17 | -8.45±0.80           |

**Table S8.** Calculated individual energy terms of mGluR4 ligands using MM-GBSA (GB2

| Ligands       | $\Delta E_{vdw}$ | $\Delta E_{ele}$ | $\Delta G_p^{sol}$ | $\Delta G_{np}^{sol}$ | TAS         | $\Delta G_{MM/GBSA}$ |
|---------------|------------------|------------------|--------------------|-----------------------|-------------|----------------------|
| CHEMBL33567   | -21.93±1.06      | -232.70±2.95     | 146.29±2.65        | -3.85±0.02            | -19.02±0.01 | -93.17±2.07          |
| CHEMBL230951  | -20.71±0.99      | -213.19±0.86     | 141.13±2.33        | -3.94±0.03            | -18.72±0.08 | -77.99±0.68          |
| CHEMBL39573   | -25.26±0.27      | -199.86±1.36     | 138.58±2.49        | -4.10±0.01            | -19.51±0.06 | -71.12±0.89          |
| CHEMBL39338   | -44.27±0.89      | -190.38±3.58     | 151.90±2.78        | -6.67±0.06            | -23.37±0.10 | -66.05±0.47          |
| CHEMBL432038  | -33.74±1.91      | -230.74±4.65     | 186.11±2.97        | -5.50±0.00            | -22.32±0.09 | -61.55±1.33          |
| CHEMBL329236  | -19.01±0.83      | -356.81±4.84     | 302.15±4.07        | -4.08±0.05            | -19.45±0.07 | -58.31±0.26          |
| CHEMBL8759    | -17.78±0.56      | -228.11±1.43     | 172.99±2.20        | -3.49±0.02            | -18.55±0.03 | -57.85±1.25          |
| CHEMBL275079  | -17.09±0.84      | -237.98±2.30     | 187.42±1.16        | -3.39±0.03            | -18.22±0.04 | -52.81±2.14          |
| CHEMBL575060  | -14.36±1.03      | -223.63±2.17     | 175.05±2.95        | -3.65±0.01            | -18.17±0.06 | -48.42±1.62          |
| CHEMBL90501   | -19.31±0.37      | -215.64±3.31     | 172.76±4.19        | -3.33±0.02            | -18.49±0.05 | -47.04±2.80          |
| CHEMBL40123   | -35.84±1.92      | -195.14±1.60     | 168.96±1.43        | -5.92±0.06            | -22.57±0.10 | -45.38±0.38          |
| CHEMBL279838  | -18.67±0.95      | -194.44±1.17     | 158.26±0.43        | -3.92±0.02            | -18.69±0.09 | -40.08±1.98          |
| CHEMBL34453   | -21.29±0.28      | -206.49±2.98     | 174.41±4.74        | -3.39±0.01            | -18.45±0.06 | -38.31±3.72          |
| CHEMBL389558  | -13.26±0.57      | -208.25±3.20     | 180.14±2.14        | -2.97±0.06            | -15.48±0.11 | -28.86±3.52          |
| CHEMBL40086   | -20.07±0.35      | -236.90±2.25     | 214.95±1.34        | -3.32±0.02            | -18.30±0.08 | -27.04±1.44          |
| CHEMBL280563  | -14.45±0.99      | -167.57±0.96     | 144.20±1.08        | -2.98±0.03            | -16.39±0.02 | -24.40±0.58          |
| CHEMBL277475  | -15.43±0.45      | -331.32±5.32     | 310.05±2.68        | -3.72±0.03            | -17.10±0.04 | -23.32±2.40          |
| CHEMBL2115159 | -19.42±1.13      | -159.87±6.09     | 144.68±5.83        | -3.77±0.06            | -17.64±0.17 | -20.75±0.73          |
| CHEMBL313938  | -17.03±0.24      | -175.06±3.54     | 159.58±3.56        | -3.37±0.03            | -16.80±0.11 | -19.07±3.31          |
| CHEMBL2114106 | -21.05±0.26      | -170.15±3.95     | 159.87±2.88        | -3.84±0.04            | -17.36±0.09 | -17.80±1.55          |
| CHEMBL2114109 | -17.44±0.62      | -186.44±1.36     | 174.33±2.74        | -3.77±0.06            | -17.17±0.19 | -16.13±1.10          |
| CHEMBL467234  | -26.10±0.32      | -191.63±2.05     | 187.25±1.78        | -4.36±0.03            | -19.51±0.14 | -15.33±0.53          |
| CHEMBL2021372 | -14.45±0.40      | -220.56±0.91     | 206.45±2.14        | -3.32±0.02            | -16.97±0.04 | -14.91±1.25          |
| CHEMBL88184   | -23.89±1.07      | -108.59±2.74     | 105.11±2.38        | -3.76±0.01            | -18.59±0.04 | -12.53±1.24          |
| CHEMBL2114110 | -22.20±0.57      | -128.25±2.94     | 124.75±1.86        | -3.42±0.05            | -16.78±0.29 | -12.35±1.28          |
| CHEMBL315032  | -18.81±0.33      | -191.83±2.72     | 186.82±1.51        | -3.28±0.07            | -17.31±0.16 | -9.80±1.21           |
| CHEMBL297150  | -18.47±0.48      | -183.22±4.26     | 181.69±3.95        | -3.21±0.03            | -17.05±0.04 | -6.17±1.03           |
| CHEMBL284895  | -16.89±0.29      | -109.56±1.11     | 106.63±0.96        | -3.16±0.02            | -17.19±0.06 | -5.79±0.89           |
| CHEMBL1672288 | -34.56±0.72      | -18.41±0.31      | 34.32±0.44         | -5.10±0.05            | -20.00±0.15 | -3.74±0.27           |
| CHEMBL229429  | -36.06±0.27      | -4.98±0.67       | 25.03±0.91         | -4.80±0.02            | -18.88±0.07 | -1.94±0.26           |
| CHEMBL448885  | -11.20±1.13      | -232.27±1.57     | 229.62±3.85        | -3.14±0.05            | -16.70±0.10 | -0.29±1.80           |
| CHEMBL444718  | -10.02±1.27      | -184.31±0.94     | 181.99±0.46        | -2.46±0.08            | -14.79±0.22 | 0.00±0.70            |
| CHEMBL279956  | -19.12±0.93      | -76.75±1.57      | 82.68±1.78         | -3.20±0.04            | -17.00±0.11 | 0.61±0.64            |
| CHEMBL126608  | -26.80±0.55      | -94.66±2.71      | 107.54±4.03        | -3.83±0.04            | -18.94±0.06 | 1.19±2.02            |
| CHEMBL305406  | -46.77±0.67      | -6.21±0.36       | 38.03±1.04         | -5.63±0.05            | -22.43±0.13 | 1.84±0.75            |
| CHEMBL330097  | -16.57±0.67      | -140.19±4.01     | 146.84±3.05        | -2.86±0.03            | -16.05±0.07 | 3.29±1.51            |
| CHEMBL327783  | -29.38±0.42      | -9.35±1.66       | 36.45±1.03         | -3.72±0.05            | -17.10±0.17 | 11.11±1.55           |

model) method in kcal/mol.



**Table S9.** Calculated individual energy terms of mGluR4 ligands using MM-GBSA (GB5 model) method in kcal/mol.

| Ligands       | $\Delta E_{vdw}$ | $\Delta E_{ele}$ | $\Delta G_p^{sol}$ | $\Delta G_{np}^{sol}$ | $T\Delta S$ | $\Delta G_{MM/GBSA}$ |
|---------------|------------------|------------------|--------------------|-----------------------|-------------|----------------------|
| CHEMBL33567   | -21.93±1.06      | -232.70±2.95     | 115.87±4.90        | -3.85±0.02            | -19.02±0.01 | -123.59±5.41         |
| CHEMBL230951  | -20.71±0.99      | -213.19±0.86     | 114.61±2.55        | -3.94±0.03            | -18.72±0.08 | -104.51±1.12         |
| CHEMBL39573   | -25.26±0.27      | -199.86±1.36     | 124.84±6.70        | -4.10±0.01            | -19.51±0.06 | -84.86±5.18          |
| CHEMBL39338   | -44.27±0.89      | -190.38±3.58     | 151.47±3.08        | -6.67±0.06            | -23.37±0.10 | -66.47±1.10          |
| CHEMBL8759    | -17.78±0.56      | -228.11±1.43     | 165.85±3.20        | -3.49±0.02            | -18.55±0.03 | -64.99±2.66          |
| CHEMBL329236  | -19.01±0.83      | -356.81±4.84     | 307.27±5.57        | -4.08±0.05            | -19.45±0.07 | -53.19±2.27          |
| CHEMBL432038  | -33.74±1.91      | -230.74±4.65     | 196.76±3.12        | -5.50±0.00            | -22.32±0.09 | -50.90±1.49          |
| CHEMBL275079  | -17.09±0.84      | -237.98±2.30     | 192.62±3.44        | -3.39±0.03            | -18.22±0.04 | -47.62±4.74          |
| CHEMBL389558  | -13.26±0.57      | -208.25±3.20     | 165.30±5.42        | -2.97±0.06            | -15.48±0.11 | -43.70±7.57          |
| CHEMBL90501   | -19.31±0.37      | -215.64±3.31     | 180.30±7.65        | -3.33±0.02            | -18.49±0.05 | -39.49±6.73          |
| CHEMBL575060  | -14.36±1.03      | -223.63±2.17     | 186.37±5.85        | -3.65±0.01            | -18.17±0.06 | -37.11±4.96          |
| CHEMBL34453   | -21.29±0.28      | -206.49±2.98     | 186.44±9.46        | -3.39±0.01            | -18.45±0.06 | -26.28±8.55          |
| CHEMBL40123   | -35.84±1.92      | -195.14±1.60     | 197.99±2.40        | -5.92±0.06            | -22.57±0.10 | -16.34±0.69          |
| CHEMBL277475  | -15.43±0.45      | -331.32±5.32     | 319.34±2.05        | -3.72±0.03            | -17.10±0.04 | -14.03±4.31          |
| CHEMBL280563  | -14.45±0.99      | -167.57±0.96     | 160.20±1.37        | -2.98±0.03            | -16.39±0.02 | -8.40±1.39           |
| CHEMBL2114110 | -22.20±0.57      | -128.25±2.94     | 133.54±1.31        | -3.42±0.05            | -16.78±0.29 | -3.56±1.78           |
| CHEMBL2114106 | -21.05±0.26      | -170.15±3.95     | 174.73±2.38        | -3.84±0.04            | -17.36±0.09 | -2.94±4.01           |
| CHEMBL2115159 | -19.42±1.13      | -159.87±6.09     | 164.16±9.06        | -3.77±0.06            | -17.64±0.17 | -1.27±4.03           |
| CHEMBL279838  | -18.67±0.95      | -194.44±1.17     | 200.11±0.71        | -3.92±0.02            | -18.69±0.09 | 1.77±1.80            |
| CHEMBL2114109 | -17.44±0.62      | -186.44±1.36     | 193.82±2.41        | -3.77±0.06            | -17.17±0.19 | 3.35±1.31            |
| CHEMBL313938  | -17.03±0.24      | -175.06±3.54     | 183.98±6.68        | -3.37±0.03            | -16.80±0.11 | 5.32±6.41            |
| CHEMBL40086   | -20.07±0.35      | -236.90±2.25     | 248.59±1.58        | -3.32±0.02            | -18.30±0.08 | 6.60±3.30            |
| CHEMBL1672288 | -34.56±0.72      | -18.41±0.31      | 52.55±1.28         | -5.10±0.05            | -20.00±0.15 | 14.48±1.05           |
| CHEMBL467234  | -26.10±0.32      | -191.63±2.05     | 218.49±2.47        | -4.36±0.03            | -19.51±0.14 | 15.91±0.78           |
| CHEMBL229429  | -36.06±0.27      | -4.98±0.67       | 47.41±1.92         | -4.80±0.02            | -18.88±0.07 | 20.44±1.24           |
| CHEMBL88184   | -23.89±1.07      | -108.59±2.74     | 140.98±3.94        | -3.76±0.01            | -18.59±0.04 | 23.34±3.83           |
| CHEMBL315032  | -18.81±0.33      | -191.83±2.72     | 229.51±1.16        | -3.28±0.07            | -17.31±0.16 | 32.89±2.39           |
| CHEMBL297150  | -18.47±0.48      | -183.22±4.26     | 222.63±5.02        | -3.21±0.03            | -17.05±0.04 | 34.77±4.56           |
| CHEMBL284895  | -16.89±0.29      | -109.56±1.11     | 147.24±2.06        | -3.16±0.02            | -17.19±0.06 | 34.82±1.51           |
| CHEMBL330097  | -16.57±0.67      | -140.19±4.01     | 178.49±3.68        | -2.86±0.03            | -16.05±0.07 | 34.94±2.13           |
| CHEMBL279956  | -19.12±0.93      | -76.75±1.57      | 122.21±2.56        | -3.20±0.04            | -17.00±0.11 | 40.14±1.04           |
| CHEMBL2021372 | -14.45±0.40      | -220.56±0.91     | 262.66±3.37        | -3.32±0.02            | -16.97±0.04 | 41.30±2.26           |
| CHEMBL444718  | -10.02±1.27      | -184.31±0.94     | 224.90±0.79        | -2.46±0.08            | -14.79±0.22 | 42.91±0.77           |
| CHEMBL305406  | -46.77±0.67      | -6.21±0.36       | 82.51±2.69         | -5.63±0.05            | -22.43±0.13 | 46.32±2.13           |
| CHEMBL327783  | -29.38±0.42      | -9.35±1.66       | 77.08±2.63         | -3.72±0.05            | -17.10±0.17 | 51.74±3.59           |
| CHEMBL126608  | -26.80±0.55      | -94.66±2.71      | 161.36±8.29        | -3.83±0.04            | -18.94±0.06 | 55.01±6.23           |
| CHEMBL448885  | -11.20±1.13      | -232.27±1.57     | 288.72±5.20        | -3.14±0.05            | -16.70±0.10 | 58.81±3.11           |
